# Supplementary material for: First record of organochlorine pesticides in blood of wild and captive African leopards, Panthera pardus pardus (Linnaeus, 1758)
Source: Frontiers journal article supplement (doi:10.3389/fenvs.2022.938453), 2022-08-25
Supplement: Table_1.DOCX [file Table_1.DOCX]

| Table S1. Summary of global studies conducted on terrestrial mammalian carnivores. All values are presented in ng/g ww with dry weight indicated by asterisk (*) and lipid weight unless otherwise indicated. Exceptions are noted and explained at the footnote of this table. Multiple records for the same tissue-samples in the same species indicate sampling at different localities reported in the same paper. -: data not reported, ND: not detected, LOD: limit of detection. | | | | | | | | | | | | | | | | | | | | | |
| --- | --- | --- | --- | --- | --- | --- | --- | --- | --- | --- | --- | --- | --- | --- | --- | --- | --- | --- | --- | --- | --- |
| **Species** | **Common Name** | **Location** | | **Tissue** | **p.p’-DDE** | **o.p’-DDD** | **p.p’-DDD** | **o.p’-DDT** | **p.p’-DDT** | **ΣDDTs** | **ΣPCBs** | **ΣCHLs** | **HCB** | **αHCH** | **βHCH** | **y-HCH** | **ΣHCHs** | **ΣChlordane** | **Dieldrin** | **Endrin** | **Reference** |
| **Canidae** | | | | | | | | | | | | | | | | | | | | | |
| *Canis familiaris* | Domestic dog | Japan | | B | - | - | - | - | - | - | (<0.07-0.3) | - | - | - | - | - | - | - | - | - | Mizukawa *et al.* (2013)b,c |
|  |  | Green land | | A | - | - | - | - | - | 167 | 2996 | - | 67 | - | - | - | 61 | 1164 | 531 | - | Sonne (2010)b |
| (18-358) | (936-6740) | (38-103) | (28-126.9) | (809-1658) | (13-948) |
|  |  |  | | L | - | - | - | - | - | 666 | 43111 (20188-62655) | - | ND | - | - | - | ND | 72798 (42550-86725) | 5111 | - |  |
| (284-1018) | (4000-8030) |
|  |  |  | | B | - | - | - | - | - | 29 | 1854 | - | 61 | - | - | - | ND | 770 | 415 | - |  |
| (3-74) | (943-3801) | (38-90) | (474-1414) | (149-654) |
| *Canis lupus* | Grey wolf | | Croatia | A | - | - | - | - | - | (0.2-2.9) | - | - | (0.17-2.19) | (<LOD-0.31) | (0.19-2.49) | - | (0.72-3.23) | - | - | - | Romanić *et al.* (2015)d,f |
|  |  | | Spain | Sp | 0.54 | - | - | 218 | 1028 | - | - | - | - | - | - | - | - | - | 15 | 3 | González-Barros *et al.* (2000)b,e |
|  |  |  | | L | 3500 | - | - | 89 | 47 | - | - | - | - | - | - | - | - | - | 6 | 8 |  |
|  |  |  | | M | 16 | - | - | ND | 4 | - | - | - | - | - | - | - | - | - | 3 | ND |  |
|  |  |  | | K | 1.33 | - | - | 292 | 2278 | - | - | - | - | - | - | - | - | - | 2067 | 26 |  |
|  |  |  | | Ksr | 48 | - | - | 29 | 46 | - | - | - | - | - | - | - | - | - | 107 | 11 |  |
| *Nyctereutes procyonoides* | Raccoon Dogs | Japan | | L | 28±58 (0.45-270) | - | 17±29 (<0.2-120) | - | 1.6±6.8 (<0.2-31) | 46±73 (0.45-290) | 200±370 (15-1700) | 4400±9100 (180-43000) | 4.5±13 (0.78-61) | 0.53±0.66 (<0.2-2.5) | 41±59 (5.4-250) | - | 41±59 (6.5-250) | - | - | - | Kunisue *et al.* (2008) |
|  |  |  | | L | 58±42 (5.3-150) | - | 150±240 (0.75-650) | - | 0.57±0.86 (<0.2-2.3) | 210±270 (6.4-800) | 390±410 (24-1200) | 8200±7600 (170-22000) | 2.7±2 (0.54-6.2) | 0.23±0.72 (<0.2-2.3) | 67±74 (6.3-230) | - | 67±74 (6.3-230) | - | - | - |  |
|  |  |  | | L | 18±18 (3.7-60) | - | 8.8±8.5 (1.2-27) | - | 2.1±4.1 (<0.2-12) | 29±25 (5.1-84) | 130±100 (38-350) | 8700±6300 (2000-20000) | 1.4±0.78 (0.57-2.5) | 0.29±0.24 (<0.2-0.61) | 94±68 (24-220) | - | 94±68 (25-220) | - | - | - |  |
|  |  |  | | F | 16±27 (1.0-82) | - | <0.2 (<0.2-0.62) | - | 3±3.7 (0.14-9.2) | 19±30 (1.2-92) | 240±170 (59-600) | 590±330 (210-1000) | 1.1±0.48 (0.65-2.0) | 0.25±0.21 (<0.2-0.65) | 62±51 (6.4-150) | - | 62±51 (6.5-150) | - | - | - |  |
|  |  |  | | B | - | - | - | - | - | - | (0.02-1.1) | - | - | - | - | - | - | - | - | - | Mizukawa *et al.* (2013)b,c |
|  |  |  | | L | - | - | - | - | - | (0.8–33) | (26–330) | (33–1200) | (0.2–1.0) | - | - | - | (1.2–45) | - | - | - | Yamamoto *et al.* (2012)d |
| *Vulpes lagopus* | Arctic Foxes | Norway | | L | - | - | - | - | - | 98 (35-203) | 5486 (1535-13603) | - | - | - | - | - | - | 8656 (1406-30850) | - | - | Sonne (2010)b |
|  |  |  | | L | (1-19633) | - | - | - | - | - | (76-53129) | (121-48722) | (9-1082) | - | (3.1-527) | - | - | - | - | - | Andersen *et al.* (2015)c |
|  | Females | Alaska | | B | - | - | - | - | - | - | 1.93±1.94 (0-4.67) | - | - | - | - | - | - | - | - | - | Harley *et al.* (2016) |
|  | Males |  | | B | - | - | - | - | - | - | 0.65±1 (0-2.47) | - | - | - | - | - | - | - | - | - |  |
|  |  |  | |  |  |  |  |  |  |  |  |  |  |  |  |  |  |  |  |  |  |
|  |  |  | |  |  |  |  |  |  |  |  |  |  |  |  |  |  |  |  |  |  |
| **Species** | **Common Name** | **Location** | | **Tissue** | **p.p’-DDE** | **o.p’-DDD** | **p.p’-DDD** | **o.p’-DDT** | **p.p’-DDT** | **ΣDDTs** | **ΣPCBs** | **ΣCHLs** | **HCB** | **αHCH** | **βHCH** | **y-HCH** | **ΣHCHs** | **ΣChlordane** | **Dieldrin** | **Endrin** | **Reference** |
| *Vulpes vulpes* | Red fox | Spain | | P | <0.01 | - | - | - | - | - | 7.68±4.36 | - | - | - | - | - | - | - | - | - | Mateo *et al.* (2012)g |
|  |  |  | | L | 4.1±1.33 | - | 1.43±0.50 | - | - | - | 1321±402 | - | 0.79±0.36 | - | 0.42±0.16 | - | - | - | - | - |  |
|  |  |  | | A | 100±31 | - | 0.05±0.05 | - | 0.47±0.33 | - | 4579±1318 | - | 5.51±1.34 | 0.28±0.17 | 27.4±11.39 | 0.6±0.22 | - | - | - | - |  |
|  |  | Japan | | B | - | - | - | - | - | - | (100-680) | - | - | - | - | - | - | - | - | - | Mizukawa *et al.* (2013)b,c |
|  |  | Norway | | P | (0.02-0.08) | - | - | - | - | - | (6.8-8.8) | (3.4-5.6) | (0.34-0.82) | - | (0.12-0.15) | - | - | - | - | - | Polder *et al.* (2009)c |
| **Felidae** | | | | | | | | | | | | | | | | | | | | | |
| *Acinonyx jubatus* | Cheetah | Belgium | | P |  |  |  |  |  | 7.3±2.11 (3.75-7.51) | 16.17±4.77 (14.91-23.73) | 0.43±0.16 (0.29-0.61) | 0.13±0.02 (0.10-0.14) |  |  |  | 0.48±0.12 (0.41-0.65) |  |  |  | Malarvannan *et al.* (2020) |
| *Felis catus* | Domestic cat | Spain | | L | 37.3±37.3 | - | 0.93±0.93 | - | - | - | 221±173 | - | 0.43±0.31 | - | 0.23±0.23 | - | - | - | - | - | Mateo *et al.* (2012)g |
|  |  |  | | A | 1079±922 | - | 3.35±3.35 | - | 16.31±13.77 | - | 1055±917 | - | 5.13±2.98 | <0.01 | 3.13±0.65 | 0.60±0.60 | - | - | - | - |  |
|  |  | Japan | | B | - | - | - | - | - | - | (0.04-16) | - | - | - | - | - | - | - | - | - | Mizukawa *et al.* (2013)b,c |
| *Lynx lynx* | Eurasian lynx | Sweden | | P | (0.05-0.13) | - | - | - | - | - | (1.2-3.1) | <LOD | (0.06-0.17) | - | (0.02-0.03) | - | - | - | - | - | Polder *et al.* (2009)c |
| *Lynx pardinus* | Iberian Lynx | Spain | | P | 1.33±0.48 | - | - | - | - | - | 0.42±0.27 | - | - | - | - | - | - | - | - | - | Mateo *et al.* (2012)g |
|  |  |  | | P | 0.31±0.31 | - | - | - | - | - | 0.82±0.82 | - | - | - | - | - | - | - | - | - |  |
|  |  |  | | L | 55.1±29.6 | - | <0.01 | - | - | - | 101±44 | - | 0.4±0.4 | - | 0.27±0.14 | - | - | - | - | - |  |
|  |  |  | | L | 25.9±18.4 | - | <0.01 | - | - | - | 37±28 | - | <0.01 | - | 1.12±0.52 | - | - | - | - | - |  |
|  |  |  | | A | 455±229 | - | <0.01 | - | <0.01 | - | 510±398 | - | 1.61±0.43 | <0.01 | 4.29±1.19 | <0.01 | - | - | - | - |  |
|  |  |  | | A | 740±234 | - | <0.01 | - | <0.01 | - | 259±29 | - | 2.29±0.87 | <0.01 | 6.34±4.71 | <0.01 | - | - | - | - |  |
| *Panthera leo* | African lion | South Africa | | P |  | - | - | - | - | 0.27±0.33 (0.7-1.98) | 0.00±0.00 (0.00-0.03) | 0.01±0.01 (0.00-0.07) | 0.00±0.00 (0.00-0.03) | - | - | - | 0.04±0.09 (0.01-0.42) | - | - | - | Malarvannan *et al.* (2020) |
|  |  | Belgium | | P |  | - | - | - | - | 0.27±0.58 (0.14-1.65) | 0.51±1.13 (0.27-3.19) | 0.02±0.04 (0.02-0.11) | 0.03±0.02 (0.03-0.09) | - | - | - | 0.07±0.04 (0.04-0.15) | - | - | - |  |
| *Caracal caracal* | Caracal | South Africa | | B | 2.4±5.3 | - | 0.01±0.03 | 0.02±0.1 | 0.03±0.06 | 2.5±5.4  (0-31) | 4.3±5.9  (0.4-32) | 0.02±0.04 | 0.05±0.08 | 0.03±0.04 | 0.04±0.14 | 0.04-0.06 | 0.19-0.26  (0.11-1.7) | 0.03-0.13 | - | - | Leighton *et. al.* (2022) |
|  |  |  | | A | 212±378 | - | 1.4±3 | 0.89±2.3 | 3.8±4 | 221±382  (11-1684) | 369±378  (7.9-1272) | 0.03-0.09 | 1.2±1.9 | 0.2±0.26 | 1±1.4 | 5.3-11 | 7.1-12  (0.3-46) | 0.3-1.2 | - | - |  |
| *Panthera pardus pardus* | African leopard | South Africa | | S | 0.02±0.01 | 0.05±0.01 | 0.18±0.04 | ND | ND | 0.22±0.05  (0.14-.038) | - | - | 0.06±0.04 (0.02-0.17) | 0.1±0.06 (0.04-0.31) | ND | 0.06±0.02  0.03-0.11) | 0.17±0.07 (0.07-0.3) | 0.13±0.06 (0.05-0.3) | ND | 0.09±0.04 (0.14-0.19) | This study |
| **Hyenidae** | | | | | | | | | | | | | | | | | | | | | |
| *Crocuta crocuta* | Spotted hyena | South Africa | | P | - | - | - | - | - | 1.56±5.67 (0.18-16.89) | 0.03±0.13 (0.01-0.38) | 0.05±0.93 (0.01-2.77) | 0.04±0.04 (0.01-0.15) | - | - | - | 0.10±0.11 (0.05-0.42) | - | - | - | Malarvannan *et al.* (2020)h |

| **Species** | **Common Name** | **Location** | **Tissue** | **p.p’-DDE** | **o.p’-DDD** | **p.p’-DDD** | **o.p’-DDT** | **p.p’-DDT** | **ΣDDTs** | **ΣPCBs** | **ΣCHLs** | **HCB** | **αHCH** | **βHCH** | **y-HCH** | **ΣHCHs** | **ΣChlordane** | **Dieldrin** | **Endrin** | **Reference** |
| --- | --- | --- | --- | --- | --- | --- | --- | --- | --- | --- | --- | --- | --- | --- | --- | --- | --- | --- | --- | --- |

| **Herpestidae** | | | | | | | | | | | | | | | | | | | | | | |
| --- | --- | --- | --- | --- | --- | --- | --- | --- | --- | --- | --- | --- | --- | --- | --- | --- | --- | --- | --- | --- | --- | --- |
| *Herpestes ichneumon* | Egyptian mongoose | Spain | Plasma | 4.23±3.17 | - | - | - | - | - | 15.42±6.42 | - | - | - | - | - | - | - | | | - | - | Mateo *et al.* (2012)g |
|  |  |  | Liver | 19.3±6.9 | - | 7.72±5.37 | - | - | - | 486±256 | - | 0.08±0.03 | - | <0.01 | - | - | - | | | - | - |  |
|  |  |  | Fat | 276±125 | - | 1.67±1.67 | - | 3.29±0.61 | - | 789±292 | - | 2.91±0.34 | <0.01 | 2.55±0.51 | 1.05±0.36 | - | - | | | **-** | - |  |
| *Herpestes javanicus* | Javan Mongoose | Japan | Blood | - | - | - | - | - | - | (24-29) | - | - | - | - | - | - | | - | | - | - | Mizukawa *et al.* (2013)b,c |
|  | Females |  | Liver | 880 | - | ND | - | ND | 880 | 190 | 510 | 2.6 | ND | ND | - | <0.60 | ND | | | - | - |  |
|  | Males |  | Liver | 1390±1433 (180-3400) | - | ND | - | ND | 1390±1433 (180-3400) | 2065±2873 (200-6300) | 118±145 (9.4-330) | 1.1±0.7 (<0.3-1.8) | ND | ND | - | <0.60 | ND | | | - | - |  |
| **Mustelidae** | | | | | | | | | | | | | | | | | | | | | | |
| *Gulo gulo* | Wolverine | Norway | Plasma | (<LOD-0.02) | - | - | - | - | - | (1.7-3.6) | (0.05-0.06) | (0.33-0.39) | - | (0.04-0.07) | - | - | | - | | - | - | Polder *et al.* (2009)c |
| *Lutra lutra* | Eurasian otters | Spain | Liver | 130±66 | - | 24.5±11.2 | - | - | - | 3324±1399 | - | 28.6±18.1 | - | 1.13±0.57 | - | - | | - | | - | - | Mateo *et al.* (2012)g |
|  |  | England | Liver | 23300 | - | - | - | - | - | 60510 | - | - | - | - | - | - | | - | | 10400 | - | Mason & Macdonald (1994)b,e |
| *Meles meles* | Badger | Spain | Liver | 36.3 | - | 84.2 | - | - | - | 213 | - | <0.01 | - | 0.48 | - | - | | - | | - | - | Mateo *et al.* (2012)g |
|  |  |  | Fat | 738 | - | 13.18 | - | 9.86 | - | 924 | - | 1.27 | <0.01 | 17.1 | <0.01 | - | | - | | - | - |  |
|  |  | Japan | Blood | - | - | - | - | - | - | (<0.07-0.75) | - | - | - | - | - | - | | - | | - | - | Mizukawa *et al.* (2013)b,c |
|  |  |  |  |  |  |  |  |  |  |  |  |  |  |  |  |  | | |  |  |  |  |
| **Procyonidae** | | | | | | | | | | | | | | | | | | | | | | |
| *Procyon lotor* | Raccoon | Japan | Blood | - | - | - | - | - | - | (<0.07-2.6) | - | - | - | - | - | - | | - | | - | - | Mizukawa *et al.* (2013)b,c |
| **Ursidae** | | | | | | | | | | | | | | | | | | | | | | |
| *Ursus arctos* | Brown bear | Sweden | Plasma | <LOD | - | - | - | - | - | (0.2-0.34) | <LOD | (0.27-0.32) | - | (0.01-0.03) | - | - | | - | | - | - | Polder *et al.* (2009)c |
|  |  | Croatia | Fat | - | - | - | - | - | (0.08-1.19) | - | - | (0.08-2.25) | (<LOD-0.18) | (<LOD-0.59) | - | (0.20-1.72) | | - | | - | - | Romanić *et al.* (2015)d,f |
| **Viverridae** | | | | | | | | | | | | | | | | | | | | | | |
| *Genetta genetta* | Common genet | Spain | Liver | 754±661 | - | 33.9±15.5 | - | - | - | 2874±2685 | - | 0.43±0.11 | - | 1.06±0.47 | - | - | | - | | - | - | Mateo *et al.* (2012)g |
|  |  |  | Fat | 17531±15260 | - | 3.48±3.48 | - | 4.20±4.20 | - | 17326±15632 | - | 6.80±1.65 | 0.8±0.8 | 25.61±15.87 | 1.27±1.05 | - | | - | | - | - |  |
| *Paguma larvata* | Masked palm civet | Japan | Blood | - | - | - | - | - | - | (0.26-95) | - | - | - | - | - | - | | - | | - | - | Mizukawa *et al.* (2013)b,c |
|  |  |  | Liver | - | - | - | - | - | (84–1200) | (29–1700) | (47–590) | (0.3–1.3) | - | - | - | (1.1–44) | | - | | - | - | Yamamoto *et al.* (2012)d |

a Data from one individual, b Only mean values reported, c Range calculated from two individuals, d Only range reported, e Concentrations given in dry weight, g No range reported

Tissues represented: A=adipose tissue, B=whole blood, K=kidney, Ksr=kindey supra renal, L=liver tissue, M=muscle tissue, P=plasma, S=serum, Sp=spleen

References

Andersen, M. S., Fuglei, E., König, M., Lipasti, I., Pedersen, Å. Ø., Polder, A., Yoccoz, N. G., and Routti, H. (2015). Levels and temporal trends of persistent organic pollutants (POPs) in arctic foxes (*Vulpes lagopus*) from Svalbard in relation to dietary habits and food availability. Sci. Total Environ. 511, 112-122. https://doi.org/10.1016/j.scitotenv.2014.12.039

González-Barros, S. T. C., Piñeiro, M. E. A., Lozano, J. S., Yusty, M. A. L. (2000). Organochlorine pesticides in wolves from Galicia. Ecotoxicol. Environ. Saf. 45, 247-252. <https://doi.org/10.1006/eesa.1999.1856>

Harley, J. R., Bammler, T. K., Farin, F. M., Beyer, R. P., Kavanagh, T. J., Dunlap, K. L., Knott, K. K., Ylitalo, G. M., O’Hara, T. M. (2016). Using Domestic and Free-Ranging Arctic Canid Models for Environmental Molecular Toxicology Research. Environ. Sci. Technol. 50, 1990–1999. https://doi.org/10.1021/acs.est.5b04396

Kunisue, T., Takayanagi, N., Isobe, T., Takahashi, S., Nakatsu, S., Tsubota, T., Okumoto, K., Bushisue, S., Shindo, K., and Tanabe, S. (2008). Regional trend and tissue distribution of brominated flame retardants and persistent organochlorines in raccoon dogs (*Nyctereutes procyonoides*) from Japan. Environ. Sci. Technol. 42, 685-691. https://doi.org/10.1021/es071565z

Malarvannan, G., Poma, G., and Covaci, A. (2020). Interspecies comparison of the residue levels and profiles of persistent organic pollutants in terrestrial top predators. Environ. Res. 183, 109187. https://doi.org/10.1016/j.envres.2020.109187

Mason, C. F., and Macdonald, S. M. (1994). PCBs and organochlorine pesticide residues in otters (*Lutra lutra*) and in otter spraints from SW England and their likely impact on populations. Sci. Total Environ.144, 305-312. <https://doi.org/10.1016/0048-9697(94)90450-2>

Mateo, R., Millán, J., Rodríguez-Estival, J., Camarero, P. R., Palomares, F., and Ortiz-Santaliestra, M. E. (2012). Levels of organochlorine pesticides and polychlorinated biphenyls in the critically endangered Iberian lynx and other sympatric carnivores in Spain. Chemosphere 86, 691-700. https://doi.org/10.1016/j.chemosphere.2011.10.037

Mizukawa, H., Nomiyama, K., Nakatsu, S., Yachimori, S., Hayashi, T., Tashiro, Y., Nagano, Y., and Tanabe, S. (2013). Species-specific differences in the accumulation features of organohalogen contaminants and their metabolites in the blood of Japanese terrestrial mammals. Environ. Pollut. 174, 28-37. https://doi.org/10.1016/j.envpol.2012.11.004

Polder, A., Skåre, J. U., Tryland, M., Ropstad, E., Gabrielsen, G. W., Vikøren, T., Arnemo, J. M., Mørk, T., Killengreen, S., Leonards, P., and Lie, E. (2009). Screening of halogenated organic compounds (HOCs) in wild living terrestrial mammals in Svalbard, Norway and Northern Sweden. Statlig program for forurensningsovervåking SPFO-report 1064/2009. Norwegian School of Veterinary Science.

Romanić, S. H., Klinčić, D., Kljaković-Gašpić, Z., Kusak, J., Reljić, S., and Huber, D. (2015). Organochlorine pesticides and polychlorinated biphenyl congeners in wild terrestrial mammals from Croatia: Interspecies comparison of residue levels and compositions. Chemosphere 137:52-58. https://doi.org/10.1016/j.chemosphere.2015.05.026

Sonne, C. (2010). Health effects from long-range transported contaminants in Arctic top predators: An integrated review based on studies of polar bears and relevant model species. Environ. Int.36, 461-491. https://doi.org/10.1016/j.envint.2010.03.002

Yamamoto, M., Isobe, T., Hayashi, T., Yachimori, S., Nomiyama, K., and Tanabe, S. (2012). Contamination status and accumulation features of organohalogen compounds in raccoon dog and masked palm civet. In: Kawaguchi, M., Misaki, K., Sato, H., Yokokawa, T., Itai, T., Nguyen, T. et al. (eds) Interdisciplinary studies on environmental chemistry—environmental pollution and ecotoxicology. Terrapub, Tokyo.
